# Supplementary material for: Recent Advances in Nanoscale Based Electrocatalysts for Metal-Air Battery, Fuel Cell and Water-Splitting Applications: An Overview
Source: MDPI journal article supplement (doi:10.3390/ma15020458), 2022-01-08
Supplement: s1 [file s1]

Supplementary Information

# Recent Advances in Nanoscale Based Electrocatalysts for Metal-Air Battery, Fuel Cell and Water-Splitting Applications: An Overview

Tse-Wei Chen <sup>1</sup>, Ganesan Anushya <sup>2</sup>, Shen-Ming Chen <sup>3,\*</sup>, Palraj Kalimuthu <sup>4</sup>, Vinitha Mariyappan <sup>3</sup>, Pandi Gajendran <sup>5</sup> and Rasu Ramachandran <sup>5,\*</sup>

<sup>1</sup> Department of Materials, Imperial College London, London SW7 2AZ, UK; t.chen19@imperial.ac.uk

<sup>2</sup> Department of Physics, S.A.V. Sahaya Thai Arts and Science (Women) College, Sahayam Nagar, Kumarapuram Road, Vadakkankulam, Tirunelveli 627116, India; anushya@savsahayathaicollege.com

<sup>3</sup> Electroanalysis and Bioelectrochemistry Laboratory., Department of Chemical Engineering and Biotechnology, National Taipei University of Technology, No.1, Section 3, Chung-Hsiao East Road, Taipei 106, Taiwan; vinithavicky80@gmail.com

<sup>4</sup> School of Chemistry and Molecular Biosciences, University of Queensland, Brisbane 4072, Australia; p.kalimuthu@uq.edu.au

<sup>5</sup> Department of Chemistry, The Madura College, Vidya Nagar, Madurai 625011, India; haigaja78@yahoo.com

\* Correspondence: smchen@ntut.edu.tw (S.-M.C.); ramachandran@maduracollege.edu.in (R.R.)

**Citation:** Chen, T.-W.; Anushya, G.; Chen, S.-M.; Kalimuthu, P.; Mariyappan, V.; Gajendran, P.; Ramachandran, R. Recent Advances in Nanoscale Based Electrocatalysts for Metal-Air Battery, Fuel Cell and Water-Splitting Applications; An Overview. *Materials* **2022**, *15*, 458. <https://doi.org/10.3390/ma15020458>

Academic Editors: Vincenzo Baglio and Carmelo Lo Vecchio

Received: 27 October 2021

Accepted: 4 January 2022

Published: 8 January 2022

**Publisher's Note:** MDPI stays neutral with regard to jurisdictional claims in published maps and institutional affiliations.

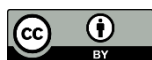

**Copyright:** © 2022 by the authors. Submitted for possible open access publication under the terms and conditions of the Creative Commons Attribution (CC BY) license (<https://creativecommons.org/licenses/by/4.0/>).

**Table S1.** Comparison of fuel cell performances on various electrocatalysts.

| Synthesis Route   | Catalysts                                 | Overpotential/Onset potential (mV) | Current Density (mA cm <sup>-2</sup> ) | Medium (M)                        | Ref. |
|-------------------|-------------------------------------------|------------------------------------|----------------------------------------|-----------------------------------|------|
| Sol-gel           | Pt/Clay/Nafion                            | 910                                | 4.2                                    | 05 H <sub>2</sub> SO <sub>4</sub> | [1]  |
| Solvothermal      | PVA/SGO/Fe <sub>3</sub> O <sub>4</sub>    | 670                                | 25.57                                  | 1M NaCl                           | [2]  |
| Hummer's          | Fe/Ni-MOFs/NG-20                          | 109                                | 8.56                                   | 0.1 KOH                           | [3]  |
| Calcinations      | Hematite-LCP electrolyte                  | 940                                | -                                      | LaCePrO <sub>x</sub> (LCP)        | [4]  |
| CVD               | Pt/GC-240                                 | 940                                | 661                                    | Polyelectrolyte                   | [5]  |
|                   | Pt/GC-500                                 | 940                                | 653                                    |                                   |      |
| Hydrothermal      | Pt/TiO <sub>2</sub> /rGO                  | 750                                | 45.8                                   | 05 H <sub>2</sub> SO <sub>4</sub> | [6]  |
| Hummer's          | Pt-MnO <sub>2</sub> -ERGO                 | 360                                | 1.76                                   | 01 H <sub>2</sub> SO <sub>4</sub> | [7]  |
| Hummer's          | XC-72/Carbon/Pd                           | 550                                | 7.3                                    | 05 H <sub>2</sub> SO <sub>4</sub> | [8]  |
| Electrodeposition | Co <sub>3</sub> O <sub>4</sub> -3DrGO/Nif | 442                                | 0.012                                  | 0.1 KOH                           | [9]  |
| Solution casting  | SPEEK/PABS-SWCNT                          | 660                                | 80                                     | 05 H <sub>2</sub> SO <sub>4</sub> | [10] |

**Table S2.** Summary of ORR and OER electrocatalytic activities of the reported various types of advanced nanoscale based catalysts.

| Synthesis Route     | Catalysts                                              | Morphology         | Specific Capacity (mAh g <sup>-1</sup> ) | Current Density (mA cm <sup>-2</sup> ) | Medium (M)                         | Ref. |
|---------------------|--------------------------------------------------------|--------------------|------------------------------------------|----------------------------------------|------------------------------------|------|
| Electrospinning     | Fe <sub>3</sub> C@N-CFs                                | Nanofiber          | 1287.3                                   | 10                                     | 0.1 KOH                            | [11] |
| Coating             | Co <sup>II</sup> -salen/MWCNT@MnO <sub>2</sub>         | Nanosheet          | 1000                                     | 0.15                                   | -                                  | [12] |
| Electrodeposition   | Co <sub>3</sub> O <sub>4</sub> @Co/NCNT                | Core-shell         | 891                                      | 135                                    | 0.5 H <sub>2</sub> SO <sub>4</sub> | [13] |
| Hydrothermal        | Zn-Co-SNN/CFP                                          | Nanoplate          | 484.7                                    | 10                                     | 0.1 KOH                            | [14] |
| Hydrothermal        | NP Co <sub>3</sub> O <sub>4</sub> /Fe@C <sub>2</sub> N | Nanoparticles      | 790.1                                    | 165.8                                  | 0.1 KOH                            | [15] |
| Hydrothermal        | 800N,P-CNT                                             | Porous structure   | 762                                      | 20                                     | 0.1 KOH                            | [16] |
| Solid-state         | PANI@ZnPC                                              | Pores structure    | 713                                      | -                                      | 7 KOH                              | [17] |
| Dissolution         | PVA-5wt.%SiO <sub>2</sub> GPE                          | Porous structure   | 720.6                                    | 0.3                                    | 0.1 KOH                            | [18] |
| Hydrothermal        | 8-MnO <sub>2</sub> /N-rGO                              | Wrinkled structure | 5250                                     | 0.2                                    | 0.1 KOH                            | [19] |
| Solution combustion | Co/CoFe <sub>2</sub> O <sub>4</sub>                    | Porous structure   | 4320                                     | 100                                    | 0.1 KOH                            | [20] |

## References

- Qin, X.; Huang, Y.; Wang, K.; Xu, T.; Wang, Y.; Wang, M.; Zhao, M.; Gao, Q. High efficient oxygen reduction reaction catalyst derived from Fe/Ni-mixed metal-organic frame works for application of fuel cell cathode. *Ind. Eng. Chem. Res.* **2019**, *58*, 10224–10237.
- Narayanamoorthy, B.; Datta, K.K.R.; Eswaramoorthy, M.; Balaji, S. Improved Oxygen Reduction Reaction Catalyzed by Pt/Clay/Nafion Nanocomposite for PEM Fuel Cells. *ACS Appl. Mater. Interfaces* **2012**, *4*, 3620–3626, doi:10.1021/am300697q.
- Beydaghi, H.; Javankakht, M. Aligned nanocomposite membrane containing sulfonated graphene oxide with superior ionic conductivity for direct methanol fuel cell applications. *Ind. Eng. Chem. Res.* **2015**, *54*, 7028–7037.
- Xia, C.; Cai, Y.; Ma, Y.; Wang, B.; Zhang, W.; Karlsson, M.; Wu, Y.; Zhu, B. Natural Mineral-Based Solid Oxide Fuel Cell with Heterogeneous Nanocomposite Derived from Hematite and Rare-Earth Minerals. *ACS Appl. Mater. Interfaces* **2016**, *8*, 20748–20755, doi:10.1021/acsami.6b05694.
- Ramaprabhu, S.; Aravind, S.S.J. Pt-nanoparticle-dispersed graphene-wrapped MWCNT composites as oxygen reduction electrocatalyst in proton exchange membrane fuel cell. *ACS Appl. Mater. Interfaces* **2012**, *4*, 3805–3810.
- Xia, B.Y.; Wu, H.B.; Chen, J.S.; Wang, Z.; Wang, X.; Lou, X.W. Formation of Pt-TiO<sub>2</sub>-rGO<sub>3</sub>-phase junction with significantly enhanced electro-activity for methanol oxidation. *Phys. Chem. Chem. Phys.* **2012**, *14*, 473–476.
- Ezhilvilian, A.T.; Rajkumar, M.; Chen, S.M.; Hu, C.C.; Boopathi, K.M.; Chu, C.W. Highly electrocatalytic performance of platinum and manganese dioxide nanoparticle decorated reduced graphene oxide sheets for methanol electro-oxidation. *RSC Adv.* **2014**, *4*, 41387–41397.
- Huang, H.; Wang, X. Pd nanoparticles supported on low-defect graphene sheets: for use as high-performance electrocatalysts for formic acid and methanol oxidation. *J. Mater. Chem.* **2012**, *22*, 22533–22541, doi:10.1039/c2jm33727d.
- Sundaradev, R.; Purkait, T. Fabrication of a membraneless non-enzymatic glucose-air fuel cell with graphene-cobalt oxide nanocomposite anode and Fe, N-doped biomass carbon cathode. *J. Electroanal. Chem.* **2020**, *874*, 114467.
- Shukla, A.; Dhanasekaran, P.; Sasikala, S.; Nagaraju, N.; Bhat, S.D.; Pillai, V.K. Nanocomposite membrane electrolyte of polyamino benzene sulfonic acid grafted single walled carbon nanotubes with sulfonated polyether ketone for direct methanol fuel cells. *Int. J. Hydrogen Energy* **2019**, *44*, 27564–27574, doi:10.1016/j.ijhydene.2019.08.189.
- Ma, Y.; Sumboja, A.; Zhang, W.; Yin, S.; Wang, S.X.; Pennycook, S.J.; Kou, Z.; Li, X.; Wang, J. Flexible and warable all-solid-state Al-air battery based on iron carbide encapsulated in electrospun porous carbon nanofibers. *ACS Appl. Mater. Interfaces* **2019**, *11*, 1988–1995.
- Hu, X.; Wang, J.; Li, X.; Wang, J.; Gregory, D.H.; Chen, J. MWCNT@MnO<sub>2</sub> nanocomposite cathode integrated with soluble O-carrier Co-salen in electrolyte for high-performance Li-Air batteries. *Nano Lett.* **2017**, *17*, 2073–2078.
- Sing, T.; Das, C.; Bothra, N.; Sikdar, N.; Das, S.; Pati, S.K.; Maji, T.K. MOF derived Co<sub>3</sub>O<sub>4</sub>/Co/NCNT nanocomposite for electrochemical hydrogen evolution, flexible Zinc-air batteries and overall water splitting. *Inorg. Chem.* **2020**, *5*, 3160–3170.
- Wu, X.; Han, X.; Ma, X.; Zhang, W.; Deng, Y.; Zhong, C.; Hu, W. Morphology-controllable synthesis of Zn-Co mixed sulfide

- nanostructures on carbon fiber paper towards efficient rechargeable Zinc-air batteries and water electrolysis. *ACS Appl. Mater. Interfaces* **2017**, *9*, 12574–12583.
15. Kim, J.; Gwon, O.; Mahmood, J.; Kim, C.; Yang, Y.; Lee, H.; Lee, J.H.; Jeong, H.Y.; Baek, J.B.; Kim, G. Synergetic coupling derived cobalt oxide with nitrogenated holly two-dimensional matrix as an efficient bifunctional catalyst for metal-air batteries. *ACS Nano*. **2019**, *5*, 5502–5512.
  16. Li, Z.; Zhao, W.; Yin, C.; Wei, L.; Wu, W.; Hu, Z.; Wu, M.; Synergistic effects between doped nitrogen and phosphorous in metal-free cathode for Zinc-air battery from covalent organic frameworks coated CNT. *ACS Appl. Mater. Interfaces* **2017**, *9*, 44519–44528.
  17. Deyab, M.; Mele, G.; Protected], [Email Polyaniline/Zn-phthalocyanines nanocomposite for protecting zinc electrode in Zn-air battery. *J. Power Sources* **2019**, *443*, 227264, doi:10.1016/j.jpowsour.2019.227264.
  18. Fan, X.; Liu, J.; Song, Z.; Han, X.; Deng, Y.; Zhong, C.; Hu, W. Porous nanocomposite gel polymer electrolyte with high ionic conductivity and superior electrolytic retention capacity for long-cycle life flexible Zinc-air batteries. *Nano Energy*, *56*, 454–462.
  19. Zhoor, A.; Faizan, R.; Elsaid, K.; Hashmi, S.; Butt, F.A.; Ghouri, Z.H. Synthesis and experimental investigation of  $\delta$ -MnO<sub>2</sub>/N-rGO nanocomposite for Li-O<sub>2</sub> batteries applications. *Chem. Eng. J. Adv.* **2021**, *7*, 100115.
  20. Athika, M.; Elumalai, P. Co/CoFe<sub>2</sub>O<sub>4</sub> decorated porous carbon network as air-breathing electrode for high-capacity rechargeable lithium-air battery; Role of Metallic Co nanoparticle. *Chem. Electro. Chem.* **2020**, *7*, 4188–4200.
